# Supplementary material for: Small-scale spatial variability in bare-ice reflectance at Jamtalferner, Austria
Source: Copernicus journal article supplement (doi:10.5194/tc-14-4063-2020), 2020-11-16

Supplement of The Cryosphere, 14, 4063–4081, 2020  
<https://doi.org/10.5194/tc-14-4063-2020-supplement>  
© Author(s) 2020. This work is distributed under  
the Creative Commons Attribution 4.0 License.

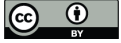

*Supplement of*

## **Small-scale spatial variability in bare-ice reflectance at Jamtalferner, Austria**

**Lea Hartl et al.**

*Correspondence to:* Lea Hartl ([lea.hartl@oeaw.ac.at](mailto:lea.hartl@oeaw.ac.at))

The copyright of individual parts of the supplement might differ from the CC BY 4.0 License.

# Landsat - band 3

## Profile 3

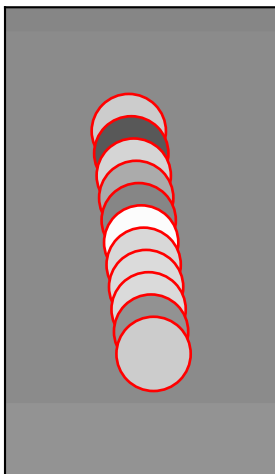

## Profile 5

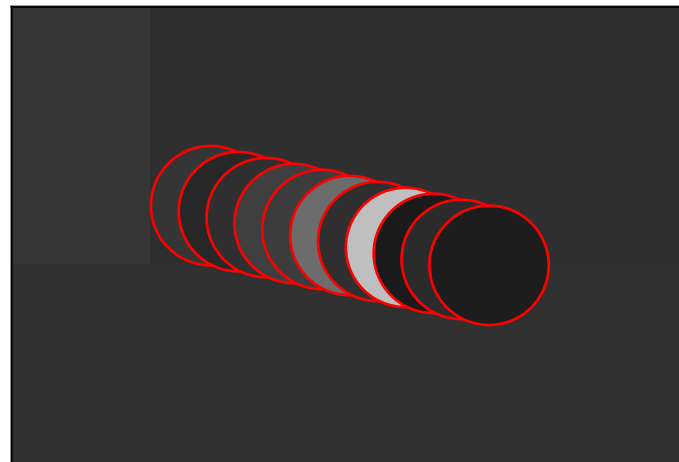

## Profile 8

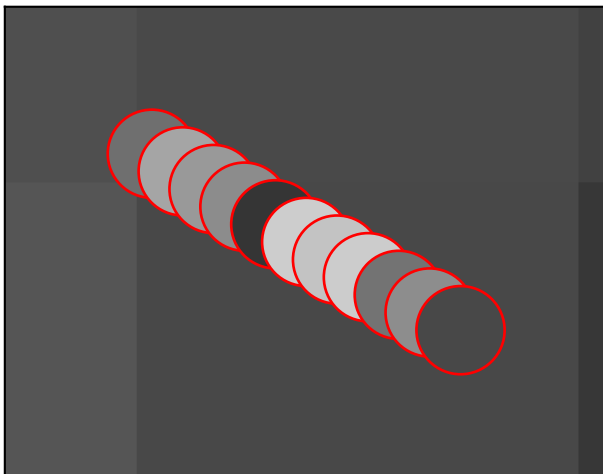

## Profile 11

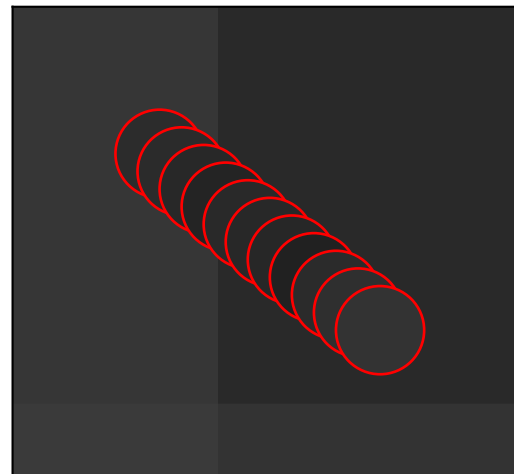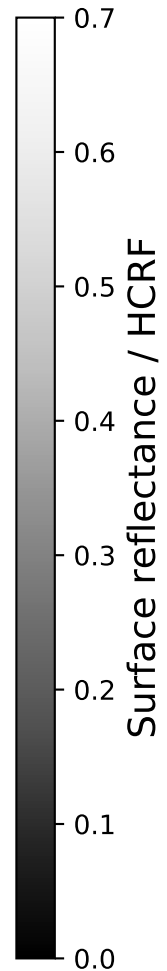

Supplement: Supplementary file 1 [file tc-14-4063-2020-supplement.pdf]
